# Supplementary material
Source: PubMed Central journal article supplement (PMC3574633)
Supplement: NIHMS439697-supplement-Supplementary_online_data.pdf [file NIHMS439697-supplement-Supplementary_online_data.pdf]

# Supplemental Material

## *Environmental Items Used in Analyses and variable names in Add Health data set*

### Parenting – Child relationship/ Parenting style

#### Parent-child relationship

1. On how many of the past 7 days was at least one of your parents in the . . . . . **H1WP8**  
room with you while you ate your evening meal?
2. How close do you feel to your {MOTHER/ADOPTIVE MOTHER/ . . . . . **H1WP9**  
STEPMOTHER/ FOSTER MOTHER/etc.}?
3. How much do you think she cares about you? . . . . . **H1WP10**
4. How close do you feel to your {FATHER/ADOPTIVE FATHER/ . . . . . **H1WP13**  
FATHER/ STEPFATHER/FOSTER FATHER/etc.}?
5. How much do you think he cares about you? . . . . . **H1WP14**

#### Parenting style

1. Most of the time, your mother is warm and loving toward you. . . . . **H1PF1**
2. Your mother encourages you to be independent. (*ethnic specific*). . . . . **H1PF2**
3. When you do something wrong that is important, your mother talks about it . . . . . **H1PF3**  
with you and helps you understand why it is wrong.
4. You are satisfied with the way your mother and you communicate with . . . . . **H1PF4**  
each other.
5. Overall, you are satisfied with your relationship with your mother . . . . . **H1PF5**
6. Most of the time, your father is warm and loving toward you. . . . . **H1PF23**
7. You are satisfied with the way your father and you communicate with each . . . . . **H1PF24**  
other.
8. Overall, you are satisfied with your relationship with your father . . . . . **H1PF25**

### Social support

#### Adult support

1. How much do you feel that adults care about you? . . . . . **H1PR1**
2. How much do you feel that your teachers care about you? . . . . . **H1PR2**

#### Friend support

3. How much do you feel that your friends care about you? . . . . . **H1PR4**

#### Neighborhood support

4. You know most of the people in your neighborhood. . . . . **H1NB1**
5. In the past month, you have stopped on the street to talk with someone who lives in  
your neighborhood. . . . . **H1NB2**
6. People in this neighborhood look out for each other. . . . . **H1NB3**

#### Home support

1. How much do you feel that people in your family understand you? . . . . . **H1PR5**
2. How much do you feel that you and your family have fun together? . . . . . **H1PR7**
3. How much do you feel that your family pays attention to you? . . . . . **H1PR8**

**Stressful Life Events**

**Suicide**

- 1. Have any of your friends tried to kill themselves during the past 12 months? . . . . . **H1SU4**
- 2. Have any of them succeeded? . . . . . **H1SU5**
- 3. Have any of your family members tried to kill themselves during the past 12 . . . . . **H1SU6**  
months?
- 4. Have any of them succeeded? . . . . . **H1SU7**

**Violence**

During the past 12 months, how often did each of the following things happen?

- 1. You saw someone shoot or stab another person. . . . . **H1FV1**
- 2. Someone pulled a knife or gun on you. . . . . **H1FV2**
- 3. Someone shot you. . . . . **H1FV3**
- 4. Someone cut or stabbed you. . . . . **H1FV4**
- 5. You got into a physical fight. . . . . **H1FV5**
- 6. You were jumped. . . . . **H1FV6**

**Socioeconomic Status**

**(interviewer remarks)**

- 1. How well kept is the building in which the respondent lives? . . . . . **H1IR11**
- 2. How well kept are most of the buildings on the street? . . . . . **H1IR14**
